# Supplementary material for: Antibiotic resistance profile of Helicobacter pylori to 14 antibiotics: a multicenter study in Fujian, China
Source: PeerJ. 2023 Jul 11;11:e15611. doi: 10.7717/peerj.15611 (PMC10348307; doi:10.7717/peerj.15611)
Supplement: Supplemental Information 1 [file peerj-11-15611-s001.xls]

## Sheet: Sheet1
			diagnosis(0:no 1:yes)			antibiotics(1:sensitive, 2:resistant)
Patients'number	sex（1:male，2:female）	age(years-old)	CSG	CAG	PU	AMX	AMC	CFM	GEN	TET	DOX	AZM	CLR	LVFX	SPFX	MTZ	TID	RFP	FZD
1	2	45	1	0	0	1	1	1	1	1	1	1	1	1	1	1	1	1	1
2	2	70	0	1	0	1	1	1	1	1	1	2	2	1	1	1	1	1	1
3	1	62	0	1	0	1	1	1	1	1	1	1	1	2	2	1	1	1	1
4	2	70	0	1	0	1	1	1	1	1	1	2	2	1	1	1	1	1	1
5	2	37	0	1	1	1	1	1	1	1	1	2	2	1	2	1	1	1	1
6	1	56	0	1	0	1	1	1	1	1	1	1	1	1	1	1	1	1	1
7	2	31	1	0	0	1	1	1	1	1	1	2	2	1	1	1	1	1	1
8	2	35	1	0	0	1	1	1	1	1	1	1	1	1	1	1	1	1	1
9	1	49	0	1	0	1	1	1	1	1	1	1	1	1	1	1	1	1	1
10	2	60	0	1	0	1	1	1	1	1	1	1	1	1	1	1	1	1	1
11	2	45	0	1	1	1	1	1	1	1	1	1	1	2	2	1	1	1	1
12	1	51	0	1	0	1	1	1	1	1	1	2	1	1	1	1	1	1	1
13	1	64	0	1	0	1	1	1	1	1	1	2	1	1	1	1	2	1	1
14	2	55	0	1	0	1	1	1	1	1	1	1	1	1	1	1	1	1	1
15	1	37	0	1	1	1	1	1	1	1	1	1	1	1	1	1	1	1	1
16	1	74	0	1	1	1	1	1	1	1	1	2	2	1	1	1	1	1	1
17	2	54	0	1	0	2	2	1	1	1	1	2	2	1	1	2	2	1	2
18	2	41	0	1	1	1	1	1	1	1	1	1	1	1	1	1	1	1	1
19	1	44	0	1	1	1	1	1	1	1	1	1	1	1	1	1	1	1	1
20	1	75	0	1	1	1	1	1	1	1	1	1	1	1	1	1	1	1	1
21	2	40	1	0	0	1	1	1	1	1	1	1	1	2	2	1	2	1	1
22	1	51	0	1	1	1	1	1	1	1	1	1	1	1	1	2	2	1	1
23	1	50	0	1	0	1	1	1	1	1	1	1	1	1	1	1	1	1	1
24	1	44	0	1	0	1	1	1	1	1	1	2	2	2	2	2	2	1	1
25	2	45	1	0	0	1	1	1	1	1	1	1	1	1	1	1	1	1	1
26	1	48	0	1	0	1	1	1	1	1	1	2	2	1	1	1	2	1	1
27	2	38	0	1	0	1	1	1	1	1	1	1	1	1	1	1	1	1	1
28	2	54	0	1	0	1	1	1	1	1	1	1	1	1	1	1	1	1	1
29	1	42	0	1	0	1	1	1	1	1	1	1	1	1	1	1	2	1	1
30	1	79	0	1	1	1	1	1	1	1	1	1	1	1	1	1	1	1	1
31	1	32	1	0	1	1	1	1	1	1	1	1	1	1	1	1	1	1	1
32	1	21	1	0	1	1	1	1	1	1	1	1	1	1	1	2	2	1	1
33	1	40	0	1	0	1	1	1	1	1	1	1	1	1	1	1	1	1	1
34	1	56	0	1	0	2	2	2	2	1	1	2	2	1	2	2	2	2	2
35	2	60	0	1	0	1	1	1	1	1	1	1	1	1	1	2	2	1	2
36	1	57	0	1	0	1	1	1	1	1	1	2	2	2	2	1	1	1	1
37	2	35	1	0	0	1	1	1	1	1	1	1	1	1	1	1	1	1	1
38	1	53	0	1	0	1	1	1	2	1	1	2	2	2	1	2	2	2	2
39	1	40	1	0	0	1	1	1	1	1	1	1	1	1	1	1	2	1	1
40	1	36	1	0	0	2	2	1	1	1	1	2	2	2	2	2	2	1	2
41	1	55	0	1	0	1	1	1	1	1	1	2	2	1	2	2	2	1	2
42	1	60	0	1	1	1	1	1	1	1	1	1	1	1	2	1	1	1	1
43	2	47	0	1	0	1	1	1	1	1	1	2	2	1	1	1	1	1	1
44	2	25	0	1	0	1	1	1	1	1	1	1	1	1	1	1	1	1	1
45	1	33	1	0	0	1	1	1	1	1	1	1	1	1	1	1	1	1	1
46	2	37	0	1	0	1	1	1	1	1	1	2	2	2	1	1	1	1	1
47	1	33	1	0	1	1	1	1	1	1	1	1	1	1	1	1	1	2	1
48	1	71	0	1	0	1	1	1	1	1	1	2	2	1	1	1	1	1	1
49	2	35	1	0	0	1	1	1	1	1	1	2	2	1	1	1	1	1	1
50	2	49	0	1	0	1	1	1	1	1	1	2	1	2	1	2	2	1	1
51	1	55	0	1	0	1	1	1	1	1	1	1	1	1	1	1	1	1	1
52	1	33	1	0	0	1	1	1	1	1	1	2	2	1	1	1	1	1	1
53	2	36	0	1	0	1	1	1	1	1	1	1	1	1	1	2	2	1	1
54	1	44	1	0	0	1	1	1	1	1	1	1	1	1	1	1	1	1	1
55	2	56	0	1	0	1	1	1	1	1	1	1	1	1	1	1	1	1	1
56	2	22	1	0	1	2	2	2	2	1	1	2	2	1	2	2	2	2	2
57	1	46	1	0	0	1	1	1	1	1	1	1	1	1	1	1	1	1	1
58	2	22	1	0	0	1	1	1	1	1	1	1	1	1	1	1	1	1	1
59	1	55	0	1	0	2	2	2	2	1	1	2	2	1		2	2	1	2
60	1	24	1	0	0	2	2	2	2	1	1	2	2	2	2	2	2	1	2
61	1	42	0	1	0	1	1	1	1	1	1	1	1	2	2	1	1	1	1
62	2	53	0	1	0	1	1	1	1	1	1	2	2	1	1	2	2	1	1
63	1	37	0	1	1	1	1	1	1	1	1	2	2	1	2	1	1	1	1
64	1	33	1	0	0	2	2	1	1	1	1	1	1	1	1	1	1	1	1
65	1	37	0	1	1	1	1	1	1	1	1	2	2	2	2	1	1	1	1
66	1	36	0	1	0	2	2	1	1	1	1	2	2	2	2	2	2	1	1
67	1	63	0	1	0	1	1	1	1	1	1	1	1	1	1	1	1	1	1
68	2	53	0	1	0	1	1	1	1	1	1	2	2	1	1	1	2	1	1
69	2	46	0	1	0	2	2	1	1	1	1	2	2	2	1	2	2	1	2
70	1	22	1	0	1	2	2	1	2	1	1	2	2	2	1	2	2	1	1
71	1	37	0	1	1	2	2	1	1	1	1	2	2	2	2	2	1	1	1
72	1	62	0	1	1	2	2	1	1	2	1	2	2	2	1	2	2	1	2
73	1	38	0	1	0	2	2	1	1	2	1	2	2	2	1	2	2	1	2
74	2	32	0	1	1	2	2	2	1	2	1	2	2	2	1	2	2	1	2
75	1	33	0	1	1	1	1	1	1	1	1	2	2	1	1	1	1	1	1
76	2	45	0	1	0	1	1	1	2	2	1	2	2	1	1	2	2	1	2
77	1	62	0	1	0	2	2	1	2	1	1	2	2	2	2	2	2	1	2
78	1	41	0	1	0	1	2	1	1	1	1	1	1	1	1	1	2	1	2
79	1	48	0	1	1	2	2	1	2	2	1	2	2	2	1	2	2	1	2
80	1	33	1	0	0	1	1	1	2	2	1	2	1	1	1	1	2	1	1
81	2	48	1	0	0	1	2	1	2	2	1	2	2	1	1	2	2	1	2
82	2	16	1	0	0	1	1	1	1	1	1	1	1	1	1	1	1	1	1
83	2	29	1	0	0	2	2	1	2	2	1	2	2	2	1	2	2	1	2
84	1	66	0	1	0	1	2	1	2	2	1	2	2	1	1	2	2	1	1
85	1	37	0	1	0	2	2	1	2	2	1	2	2	2	1	1	1	1	1
86	2	44	0	1	0	2	2	1	2	2	1	2	2	2	2	2	2	1	2
87	1	56	0	1	0	2	2	1	2	2	1	2	2	2	2	2	2	1	2
88	2	59	0	1	0	2	2	1	2	1	1	2	2	2	1	2	2	1	2
89	1	47	0	1	0	2	2	1	2	2	1	2	2	2	1	2	2	1	2
90	1	56	0	1	0	2	2	1	2	2	1	2	2	2	2	2	2	1	2
91	1	35	0	1	1	2	2	1	2	2	1	2	2	2	1	2	2	1	2
92	2	49	0	1	0	2	2	1	2	2	1	2	1	2	1	2	2	1	2
93	1	38	0	1	1	2	2	1	2	2	1	2	2	2	1	2	2	1	2
94	2	48	0	1	0	2	2	1	1	1	1	2	2	1	1	1	2	1	1
95	2	36	1	0	0	2	2	1	2	2	1	2	2	2	1	2	2	1	1
96	1	13	1	0	0	2	2	2	2	2	1	2	2	2	1	2	2	1	2
97	2	42	0	1	0	2	2	2	2	2	1	2	2	2	1	2	2	1	2
98	2	37	0	1	0	2	2	2	2	2	1	2	2	2	1	2	2	1	2
99	2	66	0	1	0	2	2	1	1	2	1	2	2	1	1	2	2	1	2
100	1	30	0	1	0	2	2	1	2	2	1	2	2	2	2	2	2	1	2
101	2	47	1	0	0	2	2	1	1	1	1	1	1	1	1	1	2	1	1
102	2	69	0	1	1	1	2	1	1	1	1	2	2	2	2	1	1	1	1
103	1	45	1	0	0	1	1	1	1	1	1	1	1	1	1	1	1	1	1
104	2	63	0	1	0	1	1	1	1	1	1	2	2	1	2	1	1	1	1
105	2	34	0	1	0	1	1	1	1	2	1	1	2	1	1	1	1	1	1
106	2	59	0	1	1	1	1	1	1	1	1	2	2	1	1	1	1	1	1
107	1	36	1	0	0	2	1	2	2	2	1	2	1	2	2	2	2	1	1
108	1	54	0	0	0	2	2	1	1	1	1	2	2	1	1	1	1	1	1
109	1	33	0	0	0	1	1	1	1	1	1	1	1	1	1	1	1	1	1
110	1	62	0	1	0	1	2	1	1	1	1	1	1	1	1	1	2	1	2
111	1	40	1	0	0	1	1	1	1	1	1	2	2	1	2	1	1	1	1
112	2	46	0	1	0	1	1	1	1	1	1	2	2	2	2	1	2	1	1
113	1	21	0	1	0	1	1	1	1	1	1	1	1	1	1	1	1	1	1
114	2	50	0	1	0	1	1	1	1	1	1	1	1	1	1	1	1	1	1
115	1	50	0	1	1	1	1	1	1	1	1	1	1	1	1	1	1	1	1
116	2	51	0	1	0	1	1	1	1	2	1	2	2	2	1	2	1	1	2
117	1	71	0	1	0	1	1	1	1	2	1	2	2	2	1	2	1	1	2
118	1	68	0	0	0	1	1	1	1	1	1	1	1	1	2	1	2	1	1
119	1	54	0	1	0	1	1	1	1	1	1	1	1	1	1	1	1	1	1
120	1	28	1	0	0	1	1	1	1	1	1	1	1	2	2	1	2	1	1
121	1	27	1	0	0	1	1	1	1	1	1	1	1	1	1	1	2	1	1
122	1	64	0	1	0	1	1	2	1	2	1	2	2	2	1	2	2	1	2
123	2	47	1	0	0	1	1	1	1	1	1	1	2	1	1	1	1	1	1
124	2	51	0	1	1	1	1	1	1	1	1	2	2	2	1	2	2	1	2
125	2	47	0	1	1	1	1	1	1	1	1	1	1	1	1	1	1	1	1
126	1	28	1	0	0	1	1	1	1	2	1	2	2	2	1	2	2	1	2
127	1	60	0	1	0	1	1	1	1	1	1	1	1	1	1	1	1	1	1
128	1	26	1	0	1	1	1	1	1	1	1	1	1	1	1	1	1	1	1
129	2	41	0	1	0	1	1	1	1	1	1	1	1	1	1	1	1	1	1
130	1	25	0	1	0	1	1	1	1	1	1	1	1	1	1	1	1	1	1
131	1	62	0	1	0	1	1	1	2	1	1	2	2	1	1	2	1	1	2
132	2	47	1	0	0	2	1	1	1	1	1	2	2	1	1	1	1	1	1
133	1	32	1	0	0	1	1	2	1	1	1	1	1	1	1	1	1	1	2
134	2	45	0	1	0	1	1	1	1	1	1	1	1	1	1	1	1	1	1
135	2	39	0	1	0	1	1	1	1	1	1	2	2	2	2	1	1	1	1
136	1	64	0	1	0	1	1	1	1	1	1	1	1	1	1	2	2	1	1
137	2	58	0	1	0	1	1	1	1	1	1	1	2	1	1	2	1	1	1
138	1	27	1	0	0	1	1	1	1	1	1	1	1	2	2	1	1	1	1
139	2	43	0	1	0	1	1	1	1	1	1	1	2	1	1	1	1	1	1
140	1	52	0	1	0	1	1	1	1	1	1	1	1	1	2	1	2	1	1
141	2	33	1	0	0	1	1	1	1	1	1	1	1	2	1	1	2	1	1
142	2	25	1	0	0	2	1	1	1	2	1	2	2	2	2	2	2	1	1
143	1	30	1	0	1	1	1	1	1	2	1	2	2	1	1	1	1	1	1
144	1	60	0	1	1	2	2	1	1	1	1	2	2	2	2	2	2	2	2
145	2	31	0	1	1	1	1	1	1	1	1	1	1	1	1	1	2	1	1
146	1	65	0	1	0	2	2	1	2	1	1	2	2	1	1	2	2	2	2
147	1	47	1	0	1	2	2	1	2	1	1	2	2	1	1	2	2	2	1
148	1	38	0	1	1	2	2	1	2	1	1	2	2	1	1	2	2	2	2
149	2	55	0	1	1	1	1	1	1	1	1	1	1	1	1	1	1	1	1
150	1	29	1	0	0	1	1	1	1	1	1	2	2	2	2	1	1	1	1
151	1	51	0	1	0	1	1	1	1	1	1	1	1	1	1	1	1	1	1
152	2	73	0	1	0	2	1	1	2	2	1	1	1	1	1	2	2	1	1
153	2	74	0	1	0	1	1	1	1	1	1	1	1	1	1	1	1	1	1
154	1	71	0	1	0	1	1	1	2	1	1	2	1	2	1	1	2	1	2
155	1	49	0	1	0	1	1	1	1	1	1	1	1	1	1	1	1	1	1
156	1	26	0	0	1	1	1	1	1	1	1	2	2	1	1	1	1	1	1
157	2	40	1	0	0	1	1	1	1	1	1	1	1	1	1	2	2	1	1
158	1	45	1	0	0	1	1	1	1	1	1	2	2	2	2	1	1	1	1
159	2	45	0	1	0	1	1	1	1	1	1	1	1	1	1	1	1	1	1
160	1	65	0	1	0	1	1	1	1	1	1	1	1	1	1	1	1	1	1
161	2	28	1	0	0	1	1	1	1	1	1	1	1	1	1	1	1	1	1
162	2	43	0	0	1	1	1	1	1	1	1	1	1	2	2	1	1	1	1
163	1	28	1	0	0	1	1	1	1	1	1	1	1	1	1	1	1	1	1
164	1	37	0	0	1	1	1	1	1	1	1	1	1	1	1	1	1	1	1
165	1	65	0	1	0	1	1	1	1	1	1	1	2	2	2	2	2	1	1
166	1	55	0	1	0	1	1	1	1	1	1	1	1	1	1	1	1	1	1
167	2	45	0	1	0	1	1	1	1	1	1	1	1	1	1	1	1	1	1
168	1	26	1	0	0	1	1	1	1	1	1	1	1	1	1	1	1	1	1
169	2	55	0	1	0	1	1	1	1	1	1	1	1	1	1	1	1	1	1
170	2	46	0	1	0	1	1	1	1	1	1	1	1	1	1	1	1	1	1
171	2	36	0	1	0	1	1	1	1	1	1	1	1	1	1	2	2	1	1
172	1	49	0	1	0	1	1	1	1	1	1	1	1	1	1	1	1	1	1
173	2	61	0	1	0	1	1	1	1	1	1	1	1	1	1	1	1	1	1
174	1	59	0	1	0	1	1	1	1	1	1	1	1	2	2	1	1	1	1
175	1	34	0	0	1	1	1	1	1	1	1	1	2	1	1	2	2	1	1
176	2	22	1	0	0	1	1	1	1	1	1	2	2	2	2	2	2	1	1
177	2	41	0	1	0	1	1	1	1	1	1	1	1	1	1	1	1	1	1
178	1	27	1	0	0	1	1	1	1	1	1	2	2	2	2	1	1	1	1
179	2	38	0	1	0	1	1	1	1	1	1	1	1	2	1	1	1	1	1
180	1	53	0	1	0	1	1	1	1	1	1	1	1	1	1	1	1	1	1
181	1	42	0	0	1	1	1	1	1	1	1	1	1	1	1	1	1	1	1
182	2	37	1	0	0	1	1	1	1	1	1	1	1	1	1	1	1	1	1
183	2	55	0	0	1	1	1	1	1	1	1	1	1	1	1	1	1	1	1
184	2	39	0	1	0	1	1	1	1	1	1	1	1	1	1	2	2	1	1
185	1	21	1	0	0	1	1	1	1	1	1	1	1	2	1	1	1	1	1
186	2	47	0	1	0	1	1	2	1	1	1	2	2	1	1	2	2	1	1
187	2	45	0	1	0	1	1	1	1	1	1	1	1	1	1	1	1	1	1
188	1	65	0	1	0	1	1	1	1	1	1	1	1	1	1	1	1	1	1
189	2	57	0	1	0	2	2	1	1	1	1	2	2	2	2	2	2	1	1
190	2	54	0	1	0	1	1	2	1	1	1	1	1	1	1	2	2	1	1
191	1	45	0	0	1	1	1	1	1	1	1	1	1	2	2	2	2	1	1
192	1	35	0	1	0	1	1	1	1	1	1	1	1	1	1	2	2	1	1
193	2	53	0	1	0	1	1	1	1	1	1	2	2	2	2	2	2	1	2
194	1	32	1	0	0	1	1	1	1	1	1	1	1	1	1	1	1	1	1
195	1	39	1	0	0	1	1	1	1	1	1	1	1	1	1	1	1	1	1
196	1	58	0	1	0	1	1	1	1	1	1	1	1	1	1	1	1	1	1
197	2	61	0	1	0	1	1	1	1	1	1	2	2	1	1	1	1	1	1
198	1	23	1	0	0	1	1	1	1	1	1	1	1	1	1	1	1	1	1
199	2	36	0	1	0	1	1	1	1	1	1	1	1	1	1	1	1	1	1
200	1	43	0	1	0	1	1	1	1	1	1	2	2	1	1	2	2	1	1
201	1	46	0	0	1	1	1	1	1	1	1	1	1	1	1	1	1	1	1
202	2	27	0	0	1	1	1	1	1	1	1	1	1	2	1	1	1	1	1
203	2	22	1	0	0	1	1	1	1	1	1	1	1	1	1	1	1	1	1
204	2	65	0	1	0	1	1	1	1	1	1	1	1	1	1	1	1	1	1
205	1	42	1	0	0	1	1	1	1	1	1	1	1	1	1	2	2	1	1
